# Supplementary material for: Effects of carbohydrate quality and amount on plasma lactate: results from the OmniCarb trial
Source: PubMed Central journal article supplement — BMJ Open Diabetes Res Care. 2020 Aug 31;8(1):e001457. doi: 10.1136/bmjdrc-2020-001457 (PMC7462151; doi:10.1136/bmjdrc-2020-001457), 2020-08-31
Supplement: bmjdrc-2020-001457supp001.pdf [file bmjdrc-2020-001457supp001.pdf]

*OmniCarb: Carbohydrates and Lactate*

## Supplementary File

**Supplement Table S1.** Achieved nutrient composition of the four diets used in the OmniCarb

**Supplement Table S2.** Inclusion and exclusion criteria

**Supplement Table S3-S23.** Sample menus for each diet by day of week and kilocalorie level, originally published by our group in JAMA (Sacks, 2014)

**Supplement Table S24.** Subgroup analysis of between-diet comparisons of change in lactate

*OmniCarb: Carbohydrates and Lactate***Supplement Table S1:** Achieved nutrient composition of the four diets used in the OmniCarb

| <b>Dietary pattern</b>  | <b>High carbohydrate/high glycemic index</b> | <b>High carbohydrate/low glycemic index</b> | <b>Low carbohydrate/high glycemic index</b> | <b>Low carbohydrate/low glycemic index</b> |
|-------------------------|----------------------------------------------|---------------------------------------------|---------------------------------------------|--------------------------------------------|
| Energy, kcal            | 2011                                         | 1998                                        | 2011                                        | 1993                                       |
| Glycemic index          | 66                                           | 41                                          | 65                                          | 40                                         |
| Carbohydrates, %kcal    | 58                                           | 57                                          | 41                                          | 40                                         |
| Protein, %kcal          | 16                                           | 16                                          | 23                                          | 23                                         |
| Fat, % kcal             | 27                                           | 27                                          | 37                                          | 37                                         |
| Saturated, % kcal       | 6                                            | 6                                           | 7                                           | 7                                          |
| Monounsaturated, % kcal | 12                                           | 13                                          | 18                                          | 19                                         |
| Polyunsaturated, % kcal | 7                                            | 8                                           | 10                                          | 10                                         |
| Animal protein, g       | 42                                           | 46                                          | 78                                          | 81                                         |
| Vegetable protein, g    | 39                                           | 38                                          | 39                                          | 39                                         |
| Fiber, g                | 32                                           | 37                                          | 29                                          | 33                                         |
| Fructose, g             | 48                                           | 40                                          | 26                                          | 28                                         |
| Cholesterol, mg         | 90                                           | 89                                          | 170                                         | 163                                        |
| Calcium, mg             | 1032                                         | 1051                                        | 993                                         | 995                                        |
| Potassium, mg           | 3963                                         | 4103                                        | 3949                                        | 4026                                       |
| Sodium, mg              | 2245                                         | 2211                                        | 2305                                        | 2199                                       |
| Magnesium, mg           | 462                                          | 429                                         | 468                                         | 440                                        |

Estimated from food analysis software (ESHA Food Processor SQL, V.10.2, ESHA Research). Note that macronutrient estimates may not sum to 100% due to rounding.

*OmniCarb: Carbohydrates and Lactate***Supplement Table S2.** Inclusion and exclusion criteria for the OmniCarb trial

## Inclusion Criteria

- Baseline SBP 120-159 mmHg and DBP <100 mmHg (mean over three screening visits) [note: stage 2 hypertension (SBP > 160 or DBP > 100 mmHg) based on the mean over three screening visits will be excluded, as well as a mean systolic BP > 170 or diastolic BP > 105 at any one visit]
- Age 30 or older
- Overweight or obese, as defined by a Body Mass Index (BMI) > 25 kg/m<sup>2</sup>
- Willing to eat at least one on-site meal/day, five days/week, and willing to eat study diets and nothing else during controlled feeding periods (run-in and intervention)
- Willingness to complete measurement procedures, including five OGTTs.

## Medication Exclusions:

- Regular use of medications during the past 2 months that raise or lower BP
- Use of a lipid lowering agent (any in 3 weeks prior to first screening visit)
- Unstable dose of hormone replacement therapy, thyroid hormone replacement therapy and psychotropic medications known to cause weight gain or affect the outcome variables (unstable defined as a change in dose within two months of the SV1 visit)
- Use of insulin, oral hypoglycemic agent, lithium, coumadin (warfarin), oral corticosteroid, anti-psychotic drugs, weight loss medications, nitrate, or digitalis.

## Medical History Exclusions:

- Active or prior CVD (stroke, MI, PTCA, CABG, congestive heart failure, symptomatic ischemic heart disease (angina), or ASCVD-related therapeutic procedure).
- Diabetes mellitus
- Cancer diagnosis or treatment in past two years (however, persons with non-melanoma skin cancer, localized breast cancer, or localized prostate cancer can enroll if they did not require systemic chemotherapy)
- Active inflammatory bowel disease, malabsorption, or major GI resection
- Renal insufficiency as determined by a serum creatinine > 1.2 mg/dL for women or > 1.4 mg/dL for men. These participants can enroll if their estimated GFR is > 40 ml/min by either the Cockcroft-Gault equation or the simplified MDRD equation.
- Emergency room visit or hospital stay for asthma or COPD in last six months
- Any serious illness not otherwise specified that would interfere with participation

## Laboratory Exclusions:

- Fasting LDL cholesterol > 220mg/dL, triglycerides > 750 mg/dl
- Fasting blood glucose >125 mg/dl
- Serum transaminase > 2 times the upper range of normal, or a clinical diagnosis of hepatitis

## Other Exclusions:

- Body weight over 420 pounds

*OmniCarb: Carbohydrates and Lactate*

- Consumption of more than 14 alcoholic drinks per week, or consumption of 6 or more drinks on an occasion, one or more occasions per week
- Significant food allergies, preferences, intolerances, or dietary requirements that would interfere with diet adherence
- Weight loss or gain of >5% or more during prior 2 months
- Planning to leave the area prior to the anticipated end of participation
- Pregnant, breast feeding, or planning pregnancy prior to the end of participation
- Current participation in another clinical trial that manipulates diet or that will affect the outcome of this study (this criterion may be waived at the site PI's judgment).
- Investigator judgment (e.g. for concerns over safety, adherence, or follow-up or for inappropriate behavior)
- Vitamin, fish-oil, weight-loss, soy, mineral, or herbal supplements that cannot be stopped (supplement use is discouraged, but this criterion may be waived at site PI's judgment and if participant remains on a constant dosage throughout the study).
- Unable to measure baseline blood pressure (due to arm circumference > 50 cm or atrial fibrillation) or obtain baseline OGTT.
- Unable to maintain a stable weight during Feeding Period 1, which is defined as a loss or gain of > 3% of their initial weight at Week 4.

*OmniCarb: Carbohydrates and Lactate***Supplement Table S24:** Subgroup Analysis of Between-Diet Comparisons of Change in Lactate

|                          |              | <b>Baseline No</b> | <b>CG vs cg (<math>\beta</math>, 95% CI)</b> | <b>P*</b> |
|--------------------------|--------------|--------------------|----------------------------------------------|-----------|
| Age, year                |              |                    |                                              |           |
|                          | <60          | 119                | -0.08 (-0.17, 0.02)                          |           |
|                          | $\geq 60$    | 40                 | -0.10 (-0.25, 0.04)                          | 0.78      |
| Sex                      |              |                    |                                              |           |
|                          | Female       | 85                 | -0.04 (-0.14, 0.06)                          |           |
|                          | Male         | 74                 | -0.13 (-0.25, -0.00)                         | 0.29      |
| Race                     |              |                    |                                              |           |
|                          | White        | 65                 | -0.10 (-0.20, 0.00)                          |           |
|                          | Black        | 82                 | -0.07 (-0.19, 0.06)                          | 0.70      |
| BMI, kg/m <sup>2</sup>   |              |                    |                                              |           |
|                          | 25-29.9      | 69                 | -0.07 (-0.19, 0.05)                          |           |
|                          | $\geq 30$    | 90                 | -0.09 (-0.20, 0.02)                          | 0.82      |
| Hypertension status      |              |                    |                                              |           |
|                          | No           | 117                | -0.07 (-0.17, 0.02)                          |           |
|                          | Yes          | 42                 | -0.11 (-0.24, 0.02)                          | 0.69      |
| Baseline fasting glucose |              |                    |                                              |           |
|                          | BG<100 mg/dL | 102                | -0.07 (-0.17, 0.03)                          |           |
|                          | BG 100-125   | 57                 | -0.11 (-0.24, 0.03)                          | 0.65      |
| HOMA (median), units     |              |                    |                                              |           |
|                          | $\leq 1.48$  | 80                 | -0.09 (-0.21, 0.03)                          |           |
|                          | >1.48        | 79                 | -0.07 (-0.17, 0.03)                          | 0.82      |

\*The p values refer to significance of the interaction terms in each model. From top to bottom, the interaction terms are age x diet, sex x diet, race x diet, BMI x diet, hypertension status x diet, baseline fasting glucose x diet, and HOMA x diet, respectively.

CG: high carbohydrate, high glycemic index diet; cg: low carbohydrate, low glycemic index diet. Abbreviations: HOMA: Homeostatic Model Assessment of Insulin Resistance
